# Supplementary material
Source: ML conference proceedings conference paper supplement (https://proceedings.neurips.cc/paper_files/paper/2013/hash/0ed9422357395a0d4879191c66f4faa2-Abstract.html)
Supplement: Supplementary file [file 0ed9422357395a0d4879191c66f4faa2-Supplemental.zip]

## 1 Supplementary materials for RSC

### Proof of Lemma 3.2:

*Proof.* Recall that  $\mathcal{D}_{ii} = \theta_i [D_B]_{z_i}$  and  $[\Theta_\tau]_{ii} = \theta_i \frac{\mathcal{D}_{ii}}{\mathcal{D}_{ii} + \tau}$ . The  $ij$ 'th element of  $\mathcal{L}_\tau$ :

$$[\mathcal{L}_\tau]_{ij} = \frac{\mathcal{A}_{ij}}{\sqrt{(\mathcal{D}_{ii} + \tau)(\mathcal{D}_{jj} + \tau)}} = \frac{\theta_i \theta_j B_{z_i z_j}}{\sqrt{\mathcal{D}_{ii} \mathcal{D}_{jj}}} \sqrt{\frac{\mathcal{D}_{ii}}{\mathcal{D}_{ii} + \tau} \frac{\mathcal{D}_{jj}}{\mathcal{D}_{jj} + \tau}} = \frac{B_{z_i z_j}}{\sqrt{[D_B]_{z_i} [D_B]_{z_j}}} * \sqrt{[\Theta_\tau]_{ii} [\Theta_\tau]_{jj}}.$$

Hence,

$$\mathcal{L}_\tau = \Theta_\tau^{\frac{1}{2}} Z B_L Z^T \Theta_\tau^{\frac{1}{2}}.$$

□

### Proof of Lemma 3.3:

*Proof.* Let  $C = (Z^T \Theta_\tau Z)^{1/2} B_L (Z^T \Theta_\tau Z)^{1/2}$ . If  $\theta_i > 0, i = 1, \dots, N$ , then  $C \succ 0$  since  $B \succ 0$  by assumption. Let  $\lambda_1 \geq \dots \geq \lambda_K > 0$  be the eigenvalues of  $C$ . Let  $\Lambda \in \mathcal{R}^{K \times K}$  be a diagonal matrix with its  $s$ 'th element to be  $\lambda_s$ . Let  $U \in \mathcal{R}^{K \times K}$  be an orthogonal matrix where its  $s$ 'th column is the eigenvector of  $C$  corresponding  $\lambda_s, s = 1, \dots, K$ . By eigen-decomposition, we have  $C = U \Lambda U^T$ . Define  $\mathcal{X}_\tau = \Theta_\tau^{\frac{1}{2}} Z (Z^T \Theta_\tau Z)^{-1/2} U$ , then

$$\mathcal{X}_\tau^T \mathcal{X}_\tau = U^T (Z^T \Theta_\tau Z)^{-1/2} (Z^T \Theta_\tau Z) (Z^T \Theta_\tau Z)^{-1/2} U = U^T U = I.$$

On the other hand,

$$\mathcal{X}_\tau \Lambda \mathcal{X}_\tau^T = \Theta_\tau^{\frac{1}{2}} Z (Z^T \Theta_\tau Z)^{-1/2} C (Z^T \Theta_\tau Z)^{-1/2} Z^T \Theta_\tau^{\frac{1}{2}} = \Theta_\tau^{\frac{1}{2}} Z B_L Z^T \Theta_\tau^{\frac{1}{2}} = \mathcal{L}_\tau.$$

Hence,  $\lambda_s, s = 1, \dots, K$  are  $\mathcal{L}_\tau$ 's positive eigenvalues and  $\mathcal{X}_\tau$  contains  $\mathcal{L}_\tau$ 's eigenvectors corresponding to its nonzero eigenvalues. For part 2, notice that  $\|\mathcal{X}_\tau^i\|_2 = (\frac{[\Theta_\tau]_{ii}}{[Z^T \Theta_\tau Z]_{z_i z_i}})^{1/2}$ , then

$$[\mathcal{X}_\tau^*]^i = \frac{\mathcal{X}_\tau^i}{\|\mathcal{X}_\tau^i\|_2} = \frac{([\Theta_\tau]_{ii} / [Z^T \Theta_\tau Z]_{z_i z_i})^{1/2} Z_i U}{\|\mathcal{X}_\tau^i\|_2} = Z_i U.$$

Therefore,  $\mathcal{X}_\tau^* = ZU$ .

□

### Proof of Theorem 4.1:

*Proof.* We extend the proof of Theorem 2 in Chung and Radcliffe [1] to the case of regularized graph laplacian. Let  $H = \mathcal{D}_\tau^{-1/2} A \mathcal{D}_\tau^{-1/2}$ . Then  $\|L_\tau - \mathcal{L}_\tau\| \leq \|H - \mathcal{L}_\tau\| + \|L_\tau - H\|$ . We bound the two terms separately.

For the first term, we apply the concentration inequality for matrix:

**Lemma 1.1.** *Let  $X_1, X_2, \dots, X_m$  be independent random  $N \times N$  Hermitian matrices. Moreover, assume that  $\|X_i - \mathbb{E}(X_i)\| \leq M$  for all  $i$ , and put  $v^2 = \|\sum \text{var}(X_i)\|$ . Let  $X = \sum X_i$ . Then for any  $a > 0$ ,*

$$\text{pr}(\|X - \mathbb{E}(X)\| \geq a) \leq 2N \exp\left(-\frac{a^2}{2v^2 + 2Ma/3}\right).$$

Notice that  $\|H - \mathcal{L}_\tau\| = \mathcal{D}_\tau^{-1/2} (A - \mathcal{A}) \mathcal{D}_\tau^{-1/2}$ . Let  $E^{ij} \in \mathcal{R}^{N \times N}$  be the matrix with 1 in the  $ij$  and  $ji$ 'th positions and 0 everywhere else. Let

$$\begin{aligned} X_{ij} &= \mathcal{D}_\tau^{-1/2} ((A_{ij} - p_{ij}) E^{ij}) \mathcal{D}_\tau^{-1/2} \\ &= \frac{A_{ij} - p_{ij}}{\sqrt{(\mathcal{D}_{ii} + \tau)(\mathcal{D}_{jj} + \tau)}} E^{ij}. \end{aligned}$$

$H - \mathcal{L}_\tau = \sum X_{ij}$ . Then we can apply the matrix concentration theorem on  $\{X_{ij}\}$ . By similar argument as in [1], we have

$$\|X_{ij}\| \leq [(\mathcal{D}_{ii} + \tau)(\mathcal{D}_{jj} + \tau)]^{-1/2} \leq \frac{1}{\delta + \tau}, \quad v^2 = \|\sum E(X_{ij}^2)\| \leq \frac{1}{\delta + \tau}.$$

Take  $a = \sqrt{\frac{3 \ln(4N/\epsilon)}{\delta + \tau}}$ . By assumption  $\delta + \tau > 3 \ln N + 3 \ln(4/\epsilon)$ , it implies  $a < 1$ . Applying Lemma 1.1, we have

$$\begin{aligned} \text{pr}(\|H - \mathcal{L}_\tau\| \geq a) &\leq 2N \exp\left(-\frac{\frac{3 \ln(4N/\epsilon)}{\delta + \tau}}{2/(\delta + \tau) + 2a/[3(\delta + \tau)]}\right) \\ &\leq 2N \exp\left(-\frac{3 \ln(4N/\epsilon)}{3}\right) \\ &\leq \epsilon/2. \end{aligned}$$

For the second term, first we apply the two sided concentration inequality for each  $i$ , (see for example Chung and Lu [2, chap. 2])

$$\text{pr}(|D_{ii} - \mathcal{D}_{ii}| \geq \lambda) \leq \exp\{-\frac{\lambda^2}{2\mathcal{D}_{ii}}\} + \exp\{-\frac{\lambda^2}{2\mathcal{D}_{ii} + \frac{2}{3}\lambda}\}$$

Let  $\lambda = a(\mathcal{D}_{ii} + \tau)$ , where  $a$  is the same as in the first part.

$$\begin{aligned} \text{pr}(|D_{ii} - \mathcal{D}_{ii}| \geq a(\mathcal{D}_{ii} + \tau)) &\leq \exp\{-\frac{a^2(\mathcal{D}_{ii} + \tau)^2}{2\mathcal{D}_{ii}}\} + \exp\{-\frac{a^2(\mathcal{D}_{ii} + \tau)^2}{2\mathcal{D}_{ii} + \frac{2}{3}a(\mathcal{D}_{ii} + \tau)}\} \\ &\leq 2 \exp\{-\frac{a^2(\mathcal{D}_{ii} + \tau)^2}{(2 + \frac{2}{3}a)(\mathcal{D}_{ii} + \tau)}\} \\ &\leq 2 \exp\{-\frac{a^2(\mathcal{D}_{ii} + \tau)}{3}\} \\ &\leq 2 \exp\{-\ln(4N/\epsilon) \frac{(\mathcal{D}_{ii} + \tau)}{\delta + \tau}\} \\ &\leq 2 \exp\{-\ln(4N/\epsilon)\} \\ &\leq \epsilon/2N. \end{aligned}$$

$$\|\mathcal{D}_\tau^{-1/2} D_\tau^{1/2} - I\| = \max_i \left| \sqrt{\frac{D_{ii} + \tau}{\mathcal{D}_{ii} + \tau}} - 1 \right| \leq \max_i \left| \frac{D_{ii} + \tau}{\mathcal{D}_{ii} + \tau} - 1 \right|.$$

$$\begin{aligned} \text{pr}(\|\mathcal{D}_\tau^{-1/2} D_\tau^{1/2} - I\| \geq a) &\leq \text{pr}(\max_i \left| \frac{D_{ii} + \tau}{\mathcal{D}_{ii} + \tau} - 1 \right| \geq a) \\ &\leq \text{pr}(\cup_i \{|(D_{ii} + \tau) - (\mathcal{D}_{ii} + \tau)| \geq b(\mathcal{D}_{ii} + \tau)\}) \\ &\leq \epsilon/2. \end{aligned}$$

Note that  $\|L_\tau\| \leq 1$ , therefore, with probability at least  $1 - \epsilon/2$ , we have

$$\begin{aligned} \|L_\tau - H\| &= \|D_\tau^{-1/2} A D_\tau^{-1/2} - \mathcal{D}_\tau^{-1/2} A \mathcal{D}_\tau^{-1/2}\| \\ &= \|L_\tau - \mathcal{D}_\tau^{-1/2} D_\tau^{1/2} L_\tau D_\tau^{1/2} \mathcal{D}_\tau^{-1/2}\| \\ &= \|(I - \mathcal{D}_\tau^{-1/2} D_\tau^{1/2}) L_\tau D_\tau^{1/2} \mathcal{D}_\tau^{-1/2} + L_\tau (I - D_\tau^{1/2} \mathcal{D}_\tau^{-1/2})\| \\ &\leq \|\mathcal{D}_\tau^{-1/2} D_\tau^{1/2} - I\| \|\mathcal{D}_\tau^{-1/2} D_\tau^{1/2}\| + \|\mathcal{D}_\tau^{-1/2} D_\tau^{1/2} - I\| \\ &\leq a^2 + 2a. \end{aligned}$$

Combining the two part, we have that with probability at least  $1 - \epsilon$ ,

$$\|L_\tau - \mathcal{L}_\tau\| \leq a^2 + 3a \leq 4a,$$

where  $a = \sqrt{\frac{3 \ln(4N/\epsilon)}{\delta + \tau}}$ . □

**Proof of Theorem 4.2:**

*Proof.* First we apply a lemma from McSherry [3]:

**Lemma 1.2.** *For any matrix  $A$ , let  $P_A$  denotes the projection onto the span of  $A$ 's first  $K$  left singular vectors. Then  $P_A A$  is the optimal rank  $K$  approximation to  $A$  in the following sense. For any rank  $K$  matrix  $X$ ,  $\|A - P_A A\| \leq \|L - X\|$ . Further, for any rank  $K$  matrix  $B$ ,*

$$\|P_A A - B\|_F^2 \leq 8K \|A - B\|^2. \quad (1)$$

Let  $W \in \mathcal{R}^{K \times K}$  be a diagonal matrix that contains the  $K$  largest eigenvalues of  $L_\tau$ ,  $w_1 \geq w_2 \geq \dots \geq w_K$ . Let  $\Lambda \in \mathcal{R}^{K \times K}$  be the diagonal matrix that contains all positive eigenvalues of  $\mathcal{L}_\tau$ . Take  $A = L_\tau$  and  $B = \mathcal{L}_\tau$  in Lemma 1.2. then  $P_{L_\tau} L_\tau = X_\tau W X_\tau^T$  and the previous inequality can be rewritten as

$$\|P_{L_\tau} L_\tau - \mathcal{L}_\tau\|_F^2 = \|X_\tau W X_\tau^T - \mathcal{X}_\tau \Lambda \mathcal{X}_\tau^T\|_F^2 \leq 8K \|L_\tau - \mathcal{L}_\tau\|^2.$$

Then we apply a modified version of the Davis-Kahan theorem (Rohe et al. [4]) to  $\mathcal{L}_\tau$ .

**Proposition 1.3.** *Let  $S \subset \mathcal{R}$  be an interval. Denote  $\mathcal{X}_\tau$  as an orthonormal matrix whose column space is equal to the eigenspace of  $\mathcal{L}_\tau$  corresponding to the eigenvalues in  $\lambda_S(\mathcal{L}_\tau)$  (more formally, the column space of  $\mathcal{X}_\tau$  is the image of the spectral projection of  $\mathcal{L}_\tau$  induced by  $\lambda_S(\mathcal{L}_\tau)$ ). Denote by  $X_\tau$  the analogous quantity for  $P_{L_\tau} L_\tau$ . Define the distance between  $S$  and the spectrum of  $\mathcal{L}_\tau$  outside of  $S$  as*

$$\Delta = \min\{|\lambda - s|; \lambda \text{ eigenvalue of } \mathcal{L}_\tau, \lambda \notin S, s \in S\}.$$

*if  $\mathcal{X}_\tau$  and  $X_\tau$  are of the same dimension, then there is an orthogonal matrix  $\mathcal{O}$ , that depends on  $\mathcal{X}_\tau$  and  $X_\tau$ , such that*

$$\|X_\tau - \mathcal{X}_\tau \mathcal{O}\|_F^2 \leq \frac{2\|P_{L_\tau} L_\tau - \mathcal{L}_\tau\|_F^2}{\Delta^2}.$$

Take  $S = (\lambda_K/2, 2)$ , then  $\Delta = \lambda_K/2$ . By assumption (a)  $\sqrt{\frac{K \ln(4N/\epsilon)}{\delta + \tau}} \leq \frac{1}{8\sqrt{3}} \lambda_K$ , we have that when  $N$  is sufficiently large, with probability at least  $1 - \epsilon$ ,

$$|\lambda_K - w_K| \leq \|L_\tau - \mathcal{L}_\tau\| \leq 4\sqrt{\frac{3 \ln(4N/\epsilon)}{\delta + \tau}} \leq \lambda_K/2.$$

Hence  $w_K \in S$ .  $X$  and  $\mathcal{X}$  are of the same dimension.

$$\begin{aligned} \|X_\tau - \mathcal{X}_\tau \mathcal{O}\|_F &\leq \frac{\sqrt{2}\|P_{L_\tau} L_\tau - \mathcal{L}_\tau\|_F}{\Delta} \leq \frac{2\sqrt{2}\|P_{L_\tau} L_\tau - \mathcal{L}_\tau\|_F}{\lambda_K} \\ &\leq \frac{8\sqrt{K}\|L_\tau - \mathcal{L}_\tau\|}{\lambda_K} \\ &\leq \frac{C}{\lambda_K} \sqrt{\frac{K \ln(4N/\epsilon)}{\delta + \tau}}. \end{aligned}$$

holds for  $C = 32\sqrt{3}$  with probability at least  $1 - \epsilon$ .

For part 2, note that for any  $i$ ,

$$\|[X_\tau^*]^i - [\mathcal{X}_\tau^*]^i \mathcal{O}\|_2 \leq \frac{\|X_\tau^i - \mathcal{X}_\tau^i \mathcal{O}\|_2}{\min\{\|X_\tau^i\|_2, \|\mathcal{X}_\tau^i\|_2\}},$$

We have that

$$\|X_\tau^* - \mathcal{X}_\tau^* \mathcal{O}\|_F \leq \frac{\|X_\tau - \mathcal{X}_\tau \mathcal{O}\|_F}{m},$$

where  $m = \min_i \{\min\{\|X_\tau^i\|_2, \|\mathcal{X}_\tau^i\|_2\}\}$ . □

**Proof of Main Theorem**

*Proof.* Recall that the set of misclustered nodes is defined as:

$$\mathcal{M} = \{i : \exists j \neq i, s.t. \|C_i \mathcal{O}^T - \mathcal{C}_i\|_2 > \|C_i \mathcal{O}^T - \mathcal{C}_j\|_2\}.$$

Note that Lemma 3.3 implies that the population centroid corresponding to  $i$ 'th row of  $\mathcal{X}_\tau^*$

$$\mathcal{C}_i = Z_i U.$$

Since all population centroids are of unit length and are orthogonal to each other, a simple calculation gives a sufficient condition for one observed centroid to be closest to the population centroid:

$$\|C_i \mathcal{O}^T - \mathcal{C}_i\|_2 < 1/\sqrt{2} \Rightarrow \|C_i \mathcal{O}^T - \mathcal{C}_i\|_2 < \|C_i \mathcal{O}^T - \mathcal{C}_j\|_2 \quad \forall Z_j \neq Z_i.$$

Define the following set of nodes that do not satisfy the sufficient condition,

$$\mathcal{U} = \{i : \|C_i \mathcal{O}^T - \mathcal{C}_i\|_2 \geq 1/\sqrt{2}\}.$$

The mis-clustered nodes  $\mathcal{M} \in \mathcal{U}$ .

Define  $Q \in \mathcal{R}^{N \times K}$ , where the  $i$ 'th row of  $Q$  is  $C_i$ , the observed centroid of node  $i$  from k-means. By definition of k-means, we have

$$\|X_\tau^* - Q\|_2 \leq \|X_\tau^* - \mathcal{X}_\tau^* \mathcal{O}\|_2.$$

By triangle inequality,

$$\|Q - ZU\mathcal{O}\|_2 = \|Q - \mathcal{X}_\tau^* \mathcal{O}\|_2 \leq \|X_\tau^* - Q\|_2 + \|X_\tau^* - \mathcal{X}_\tau^* \mathcal{O}\|_2 \leq 2\|X_\tau^* - \mathcal{X}_\tau^* \mathcal{O}\|_2.$$

We have with probability at least  $1 - \epsilon$ ,

$$\begin{aligned} \frac{|\mathcal{M}|}{N} &\leq \frac{|\mathcal{U}|}{N} = \frac{1}{N} \sum_{i \in \mathcal{U}} 1 \\ &\leq \frac{2}{N} \sum_{i \in \mathcal{U}} \|C_i \mathcal{O}^T - \mathcal{C}_i\|_2^2 \\ &= \frac{2}{N} \sum_{i \in \mathcal{U}} \|C_i - Z_i U \mathcal{O}\|_2^2 \\ &\leq \frac{2}{N} \|Q - ZU\mathcal{O}\|_F^2 \\ &\leq \frac{8}{N} \|X_\tau^* - \mathcal{X}_\tau^* \mathcal{O}\|_F^2 \\ &\leq c_1 \frac{K \ln(N/\epsilon)}{Nm^2(\delta + \tau)\lambda_K^2}. \end{aligned}$$

□

## References

- [1] Fan Chung and Mary Radcliffe. On the spectra of general random graphs. *the electronic journal of combinatorics*, 18(P215):1, 2011.
- [2] Fan Rong K Chung and Linyuan Lu. *Complex graphs and networks*. Number 107. American Mathematical Soc., 2006.
- [3] F. McSherry. Spectral partitioning of random graphs. In *Foundations of Computer Science, 2001. Proceedings. 42nd IEEE Symposium on*, pages 529–537. IEEE, 2001.
- [4] K. Rohe, S. Chatterjee, and B. Yu. Spectral clustering and the high-dimensional stochastic blockmodel. *The Annals of Statistics*, 39(4):1878–1915, 2011.
